# Supplementary material for: High-Performance Thin-Layer Chromatography-Densitometry-Tandem ESI-MS to Evaluate Phospholipid Content in Exosomes of Cancer Cells
Source: MDPI journal article supplement (doi:10.3390/ijms23031150), 2022-01-21

## Supporting information

# High-Performance Thin-Layer Chromatography-Densitometry-Tandem ESI-MS to evaluate phospholipid content in exosomes of cancer cells

María Sancho-Albero<sup>1,2,\*,</sup> Carmen Jarne<sup>3,x,\*</sup>, María Savirón<sup>4</sup>, Pilar Martín-Duque<sup>2,5,6,#</sup>, Luis Membrado<sup>3</sup>, Vicente L. Cebolla<sup>3,\*</sup>, Jesús Santamaría<sup>1,2</sup>

<sup>1</sup> Department of Chemical Engineering, Aragon Institute of Nanoscience (INA), University of Zaragoza, Zaragoza, Spain

<sup>2</sup> Networking Research Center on Bioengineering Biomaterials and Nanomedicine (CIBER-BBN), Madrid, Spain

<sup>3</sup> Instituto de Carboquímica, ICB-CSIC, Zaragoza, Spain

<sup>4</sup> CEQMA-CSIC, Facultad de Ciencias, Universidad de Zaragoza, Spain

<sup>5</sup> Instituto Aragonés de Ciencias de la Salud// IIS Aragón, Zaragoza, Spain

<sup>6</sup> Fundación Araid, Zaragoza, Spain

<sup>\*</sup> Present Address: Department of Molecular Biochemistry and Pharmacology, Instituto di Ricerche Farmacologiche Mario Negri IRCCS, 20156, Milano, Italy

<sup>x</sup> Present Address: Institute of Catalysis and Petrochemistry, ICP-CSIC, Madrid, Spain

<sup>#</sup> Present Address: Surgery Department, School of Medicine, University of Zaragoza, Zaragoza, Spain

<sup>\*</sup> Correspondence: Vicente L. Cebolla: [vcebollla@icb.csic.es](mailto:vcebollla@icb.csic.es); (+34)976733977, Carmen Jarne: [c.jarne@csic.es](mailto:c.jarne@csic.es); (+34) 915854800, and María Sancho-Albero: [msancho@unizar.es](mailto:msancho@unizar.es); (+34)695347470

**Figure S1.-** HPTLC chromatographic development of standards and front of elution (m.d.  $\geq 30$  mm). Structure of standards (see Materials and Methods): 1, SM; 2, PC; 3, PS; 4, PI; 5, PE; 6, PA; 7, HexCer; 8, Chol

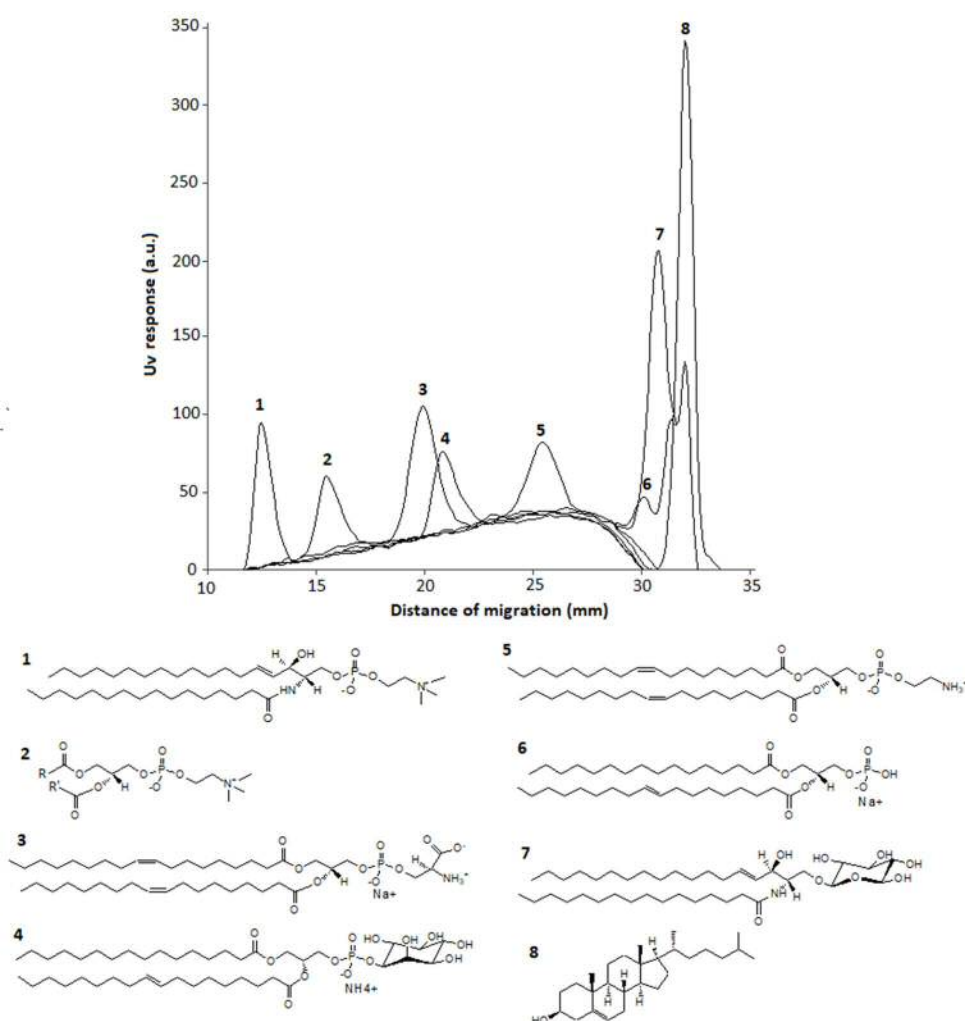

**Figure S2.-** Intra- and inter-plate HPTLC repeatability results for the standards (A) and PL classes of the B16-F1-EXOs (B), B16-F10-EXOs (C), and NIH-3T3-EXOs (D) including the RSD%,  $\pm$  Area (for a 95% confidence interval, CI).

| <b>A</b> | Intra-plate Repeatability |      |                 |      |                   |      | Inter-plate Repeatability |      |          |
|----------|---------------------------|------|-----------------|------|-------------------|------|---------------------------|------|----------|
|          | Plate 1                   |      | Plate 2         |      | Plate 3           |      | Average area              | %RSD | CI (95%) |
|          | Average peak area         | %RSD | Middle pic Area | %RSD | Average peak area | %RSD |                           |      |          |
| SM       | 1071.3                    | 2.5  | 1067.5          | 2.5  | 1111.0            | 5.6  | 1083.2                    | 3.9  | 289.1    |
| PC       | 735.4                     | 0.4  | 745.8           | 1.0  | 803.3             | 4.3  | 761.5                     | 4.8  | 251.4    |
| PS       | 1406.2                    | 2.9  | 1297.2          | 1.0  | 1208.6            | 3.2  | 1304.0                    | 6.9  | 626.3    |
| PE       | 1039.2                    | 0.1  | 992.4           | 7.9  | 835.6             | 2.4  | 955.7                     | 10.5 | 697.2    |

  

| <b>B</b> | Inter-plate Repeatability |                   |                   |              |      |
|----------|---------------------------|-------------------|-------------------|--------------|------|
|          | Peak area Plate 1         | Peak area Plate 2 | Peak area Plate 3 | Average area | %RSD |
| SM       | 1173.0                    | 1088.9            | 828.8             | 1030.2       | 17.4 |
| PC       | 1931.1                    | 1923.6            | 1723.1            | 1859.3       | 6.3  |
| PS       | 15.9                      | 50.0              | 59.8              | 41.9         | 55.0 |
| PE       | 3857.7                    | 3686.4            | 3884.3            | 3809.5       | 2.8  |

  

| <b>C</b> | Inter-plate Repeatability |                   |                   |              |      |
|----------|---------------------------|-------------------|-------------------|--------------|------|
|          | Peak area Plate 1         | Peak area Plate 2 | Peak area Plate 3 | Average area | %RSD |
| SM       | 1736.6                    | 1716.1            | 1485.9            | 1646.2       | 8.5  |
| PC       | 2382.5                    | 2484.9            | 2367.7            | 2411.7       | 2.6  |
| PS       | 98.3                      | 224.4             | 289.1             | 203.9        | 47.6 |
| PE       | 7112.8                    | 6940.1            | 7151.8            | 7068.2       | 1.6  |

  

| <b>D</b> | Intra-plate Repeatability |      |
|----------|---------------------------|------|
|          | Average peak area Plate 1 | %RSD |
| SM       | 1089.1                    | 18.0 |
| PC       | 1205.7                    | 15.8 |
| PS       | 206.5                     | 11.8 |
| PE       | 382.9                     | 8.0  |

**Figure S3.-** HPTLC-ESI-MS spectra of standards

**S3-1.-** SM, PC, PS and PE standards

- A) HPTLC-ESI<sup>+</sup>-MS spectrum of SM standard  
B) HPTLC-ESI<sup>+</sup>-MS/MS spectrum of ion precursor at  $m/z$  725.6 (SM standard)  
C) HPTLC-ESI<sup>+</sup>-MS spectrum of PC standard  
D) HPTLC-ESI<sup>+</sup>-MS/MS spectrum of ion precursor at  $m/z$  782.6 (PC standard)  
E) HPTLC-ESI-MS spectrum of PC standard  
F) HPTLC-ESI-MS spectrum of PS standard  
G) HPTLC-ESI-MS/MS spectrum of ion precursor at  $m/z$  786.8 (PS standard)  
H) HPTLC-ESI-MS spectrum of PE standard  
I) HPTLC-ESI-MS/MS spectrum of ion precursor at  $m/z$  742.8 (PE standard)  
J) HPTLC-ESI<sup>+</sup>-MS spectrum of PE standard

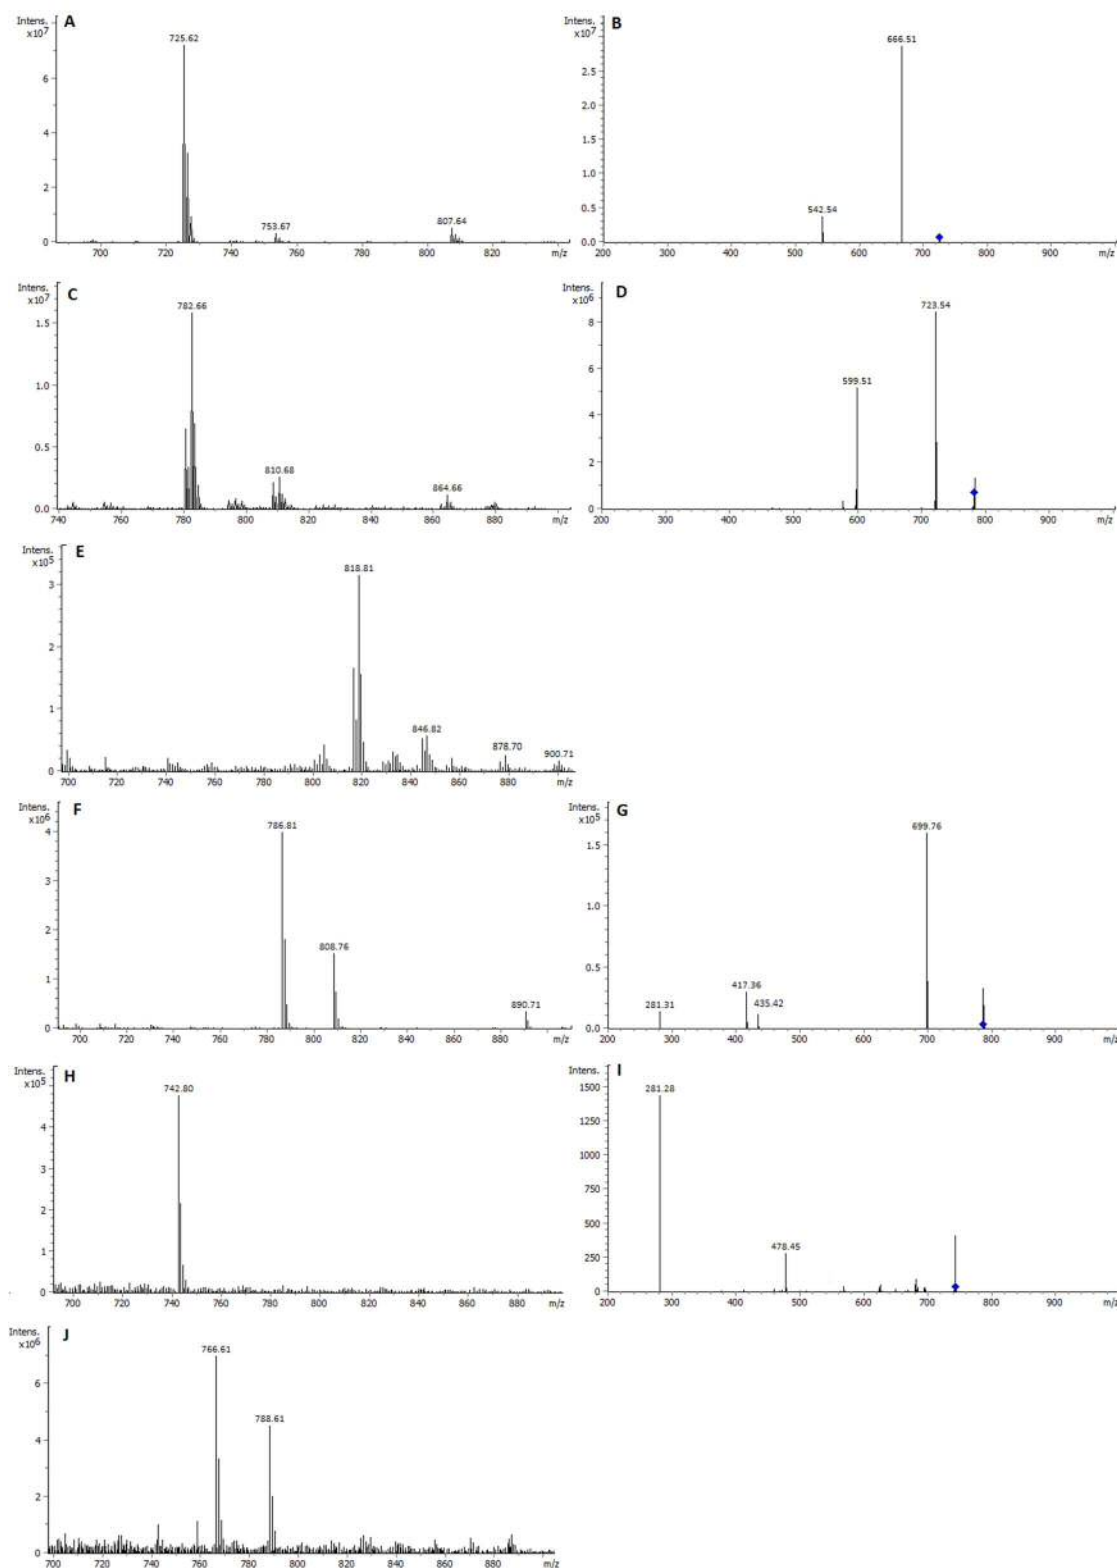

**S3-2.-** phosphatidylinositol (PI), phosphatidic acid (PA) and glucosyl ceramide (GlcCer) standards

A) HPTLC-ESI-MS spectrum of PI standard

B) HPTLC-ESI-MS/MS spectrum of ion precursor at  $m/z$  835.8 (PI standard)

C) HPTLC-ESI-MS spectrum of PA standard

D) HPTLC-ESI-MS/MS spectrum of ion precursor at  $m/z$  673.9 (PA standard)

E) HPTLC-ESI<sup>+</sup>-MS spectrum of GlcCer standard

F) HPTLC-ESI<sup>+</sup>-MS/MS spectrum of ion precursor at  $m/z$  722.6 (GlcCer standard)

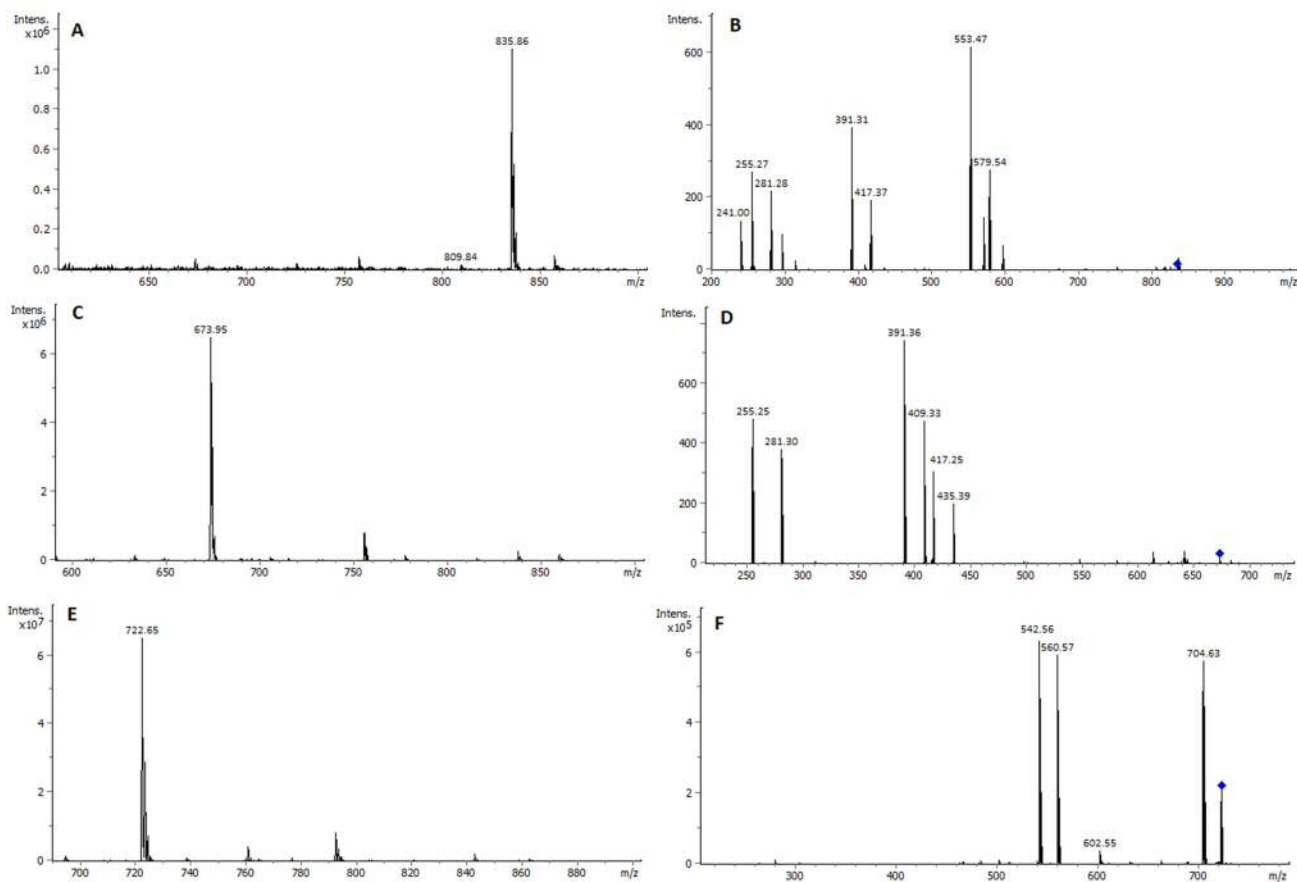

**Figure S4.**-HPTLC-ESI-MS spectra of SM, PC, PS and PI from NIH-3T3-EXOs, B16-F1-EXOs and B16-F10-EXOs.

**S4-1.**- Example of repeatability of SM from different exosome batches (1 and 2)

A) HPTLC-ESI<sup>+</sup>-MS spectrum of B16-F1-EXOs (batch 1; peak at 14.6 mm-m.d.)

B) HPTLC-ESI<sup>+</sup>-MS spectrum of B16-F1-EXOs (batch 2; peak at 14.6 mm-m.d.)

C) HPTLC-ESI<sup>+</sup>-MS spectrum of B16-F10-EXOs (batch 1; peak at 14.5 mm-m.d.)

D) HPTLC-ESI<sup>+</sup>-MS spectrum of B16-F10-EXOs (batch 2; peak at 14.5 mm-m.d.)

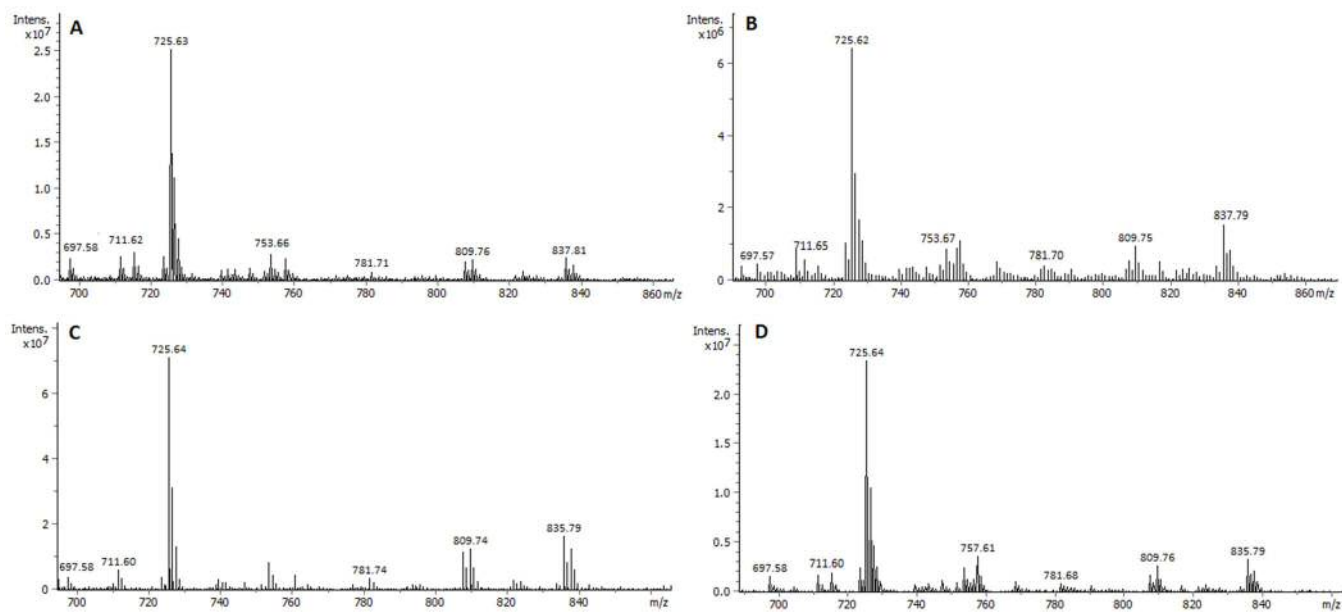

#### S4-2.- Sphingomyelins (SM)

- A) HPTLC-ESI<sup>+</sup>-MS spectrum of NIH-3T3-EXOs (peak at 14.0 mm-m.d.)  
B) HPTLC-ESI<sup>+</sup>-MS/MS spectrum of ion precursor at  $m/z$  725.6 (NIH-3T3-EXOs)  
C) HPTLC-ESI<sup>+</sup>-MS spectrum of B16-F1-EXOs (peak at 14.6 mm-m.d.)  
D) HPTLC-ESI<sup>+</sup>-MS/MS spectrum of ion precursor at  $m/z$  725.6 (B16-F1-EXOs)  
E) HPTLC-ESI-MS spectrum of B16-F1-EXOs (peak at 14.6 mm-m.d.)  
F) HPTLC-ESI<sup>+</sup>-MS spectrum of B16-F10-EXOs (peak at 14.5 mm-m.d.)  
G) HPTLC-ESI<sup>+</sup>-MS/MS spectrum of ion precursor at  $m/z$  725.6 (B16-F10-EXOs)  
H) HPTLC-ESI-MS spectrum of B16-F10-EXOs (peak at 14.5 mm-m.d.)

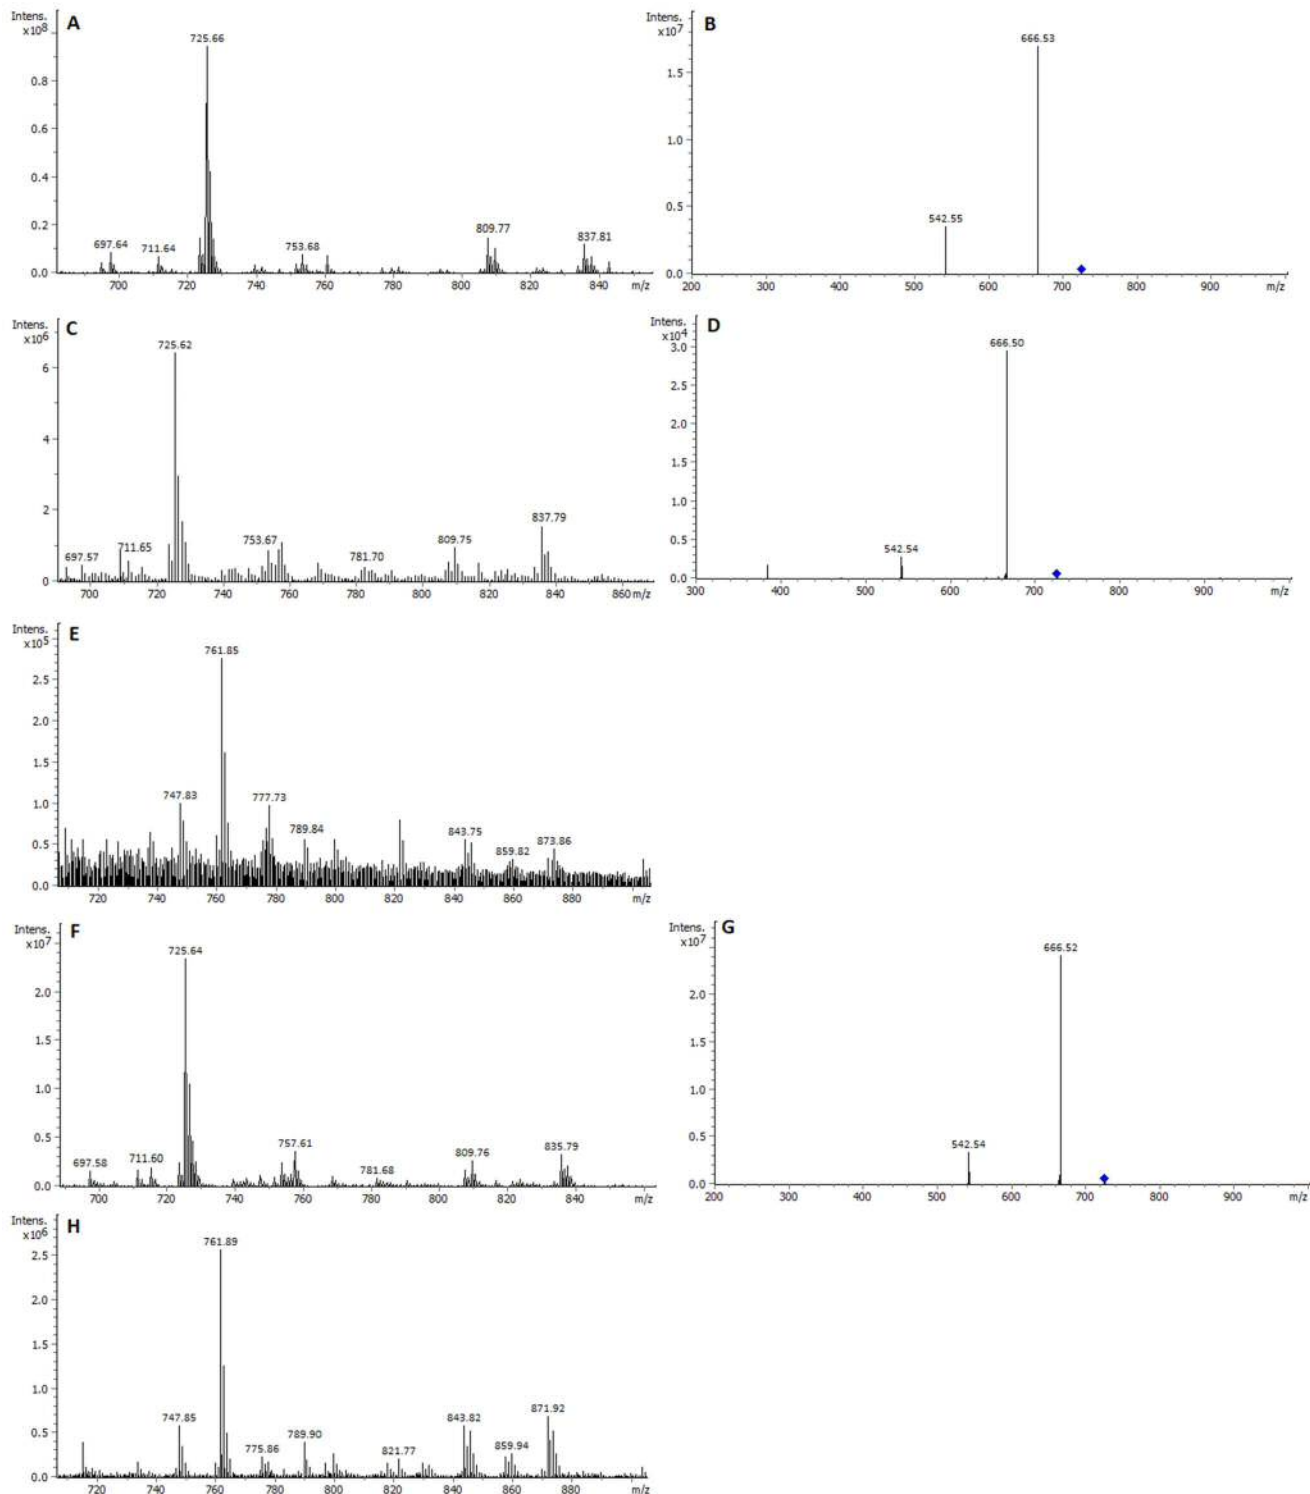

### S4-3.- Phosphatidylcholines (PC)

- A) HPTLC-ESI<sup>+</sup>-MS spectrum of NIH-3T3-EXOs (peak at 19.1 mm-m.d.)  
B) HPTLC-ESI<sup>+</sup>-MS/MS spectrum of precursor ion at  $m/z$  768.7 (NIH-3T3-EXOs)  
C) HPTLC-ESI<sup>+</sup>-MS spectrum of B16-F1-EXOs (peak at 20.3 mm-m.d.)  
D) HPTLC-ESI<sup>+</sup>-MS/MS spectrum of precursor ion at  $m/z$  782.6 (B16-F1-EXOs)  
E) HPTLC-ESI-MS spectrum of B16-F1-EXOs (peak at 20.3 mm-m.d.)  
F) HPTLC-ESI<sup>+</sup>-MS spectrum of B16-F10-EXOs (peak at 18.0 mm-m.d.)  
G) HPTLC-ESI<sup>+</sup>-MS/MS spectrum of precursor ion at  $m/z$  782.6 (B16-F10-EXOs)  
H) HPTLC-ESI-MS spectrum of B16-F10-EXOs (peak at 18.0 mm-m.d.)

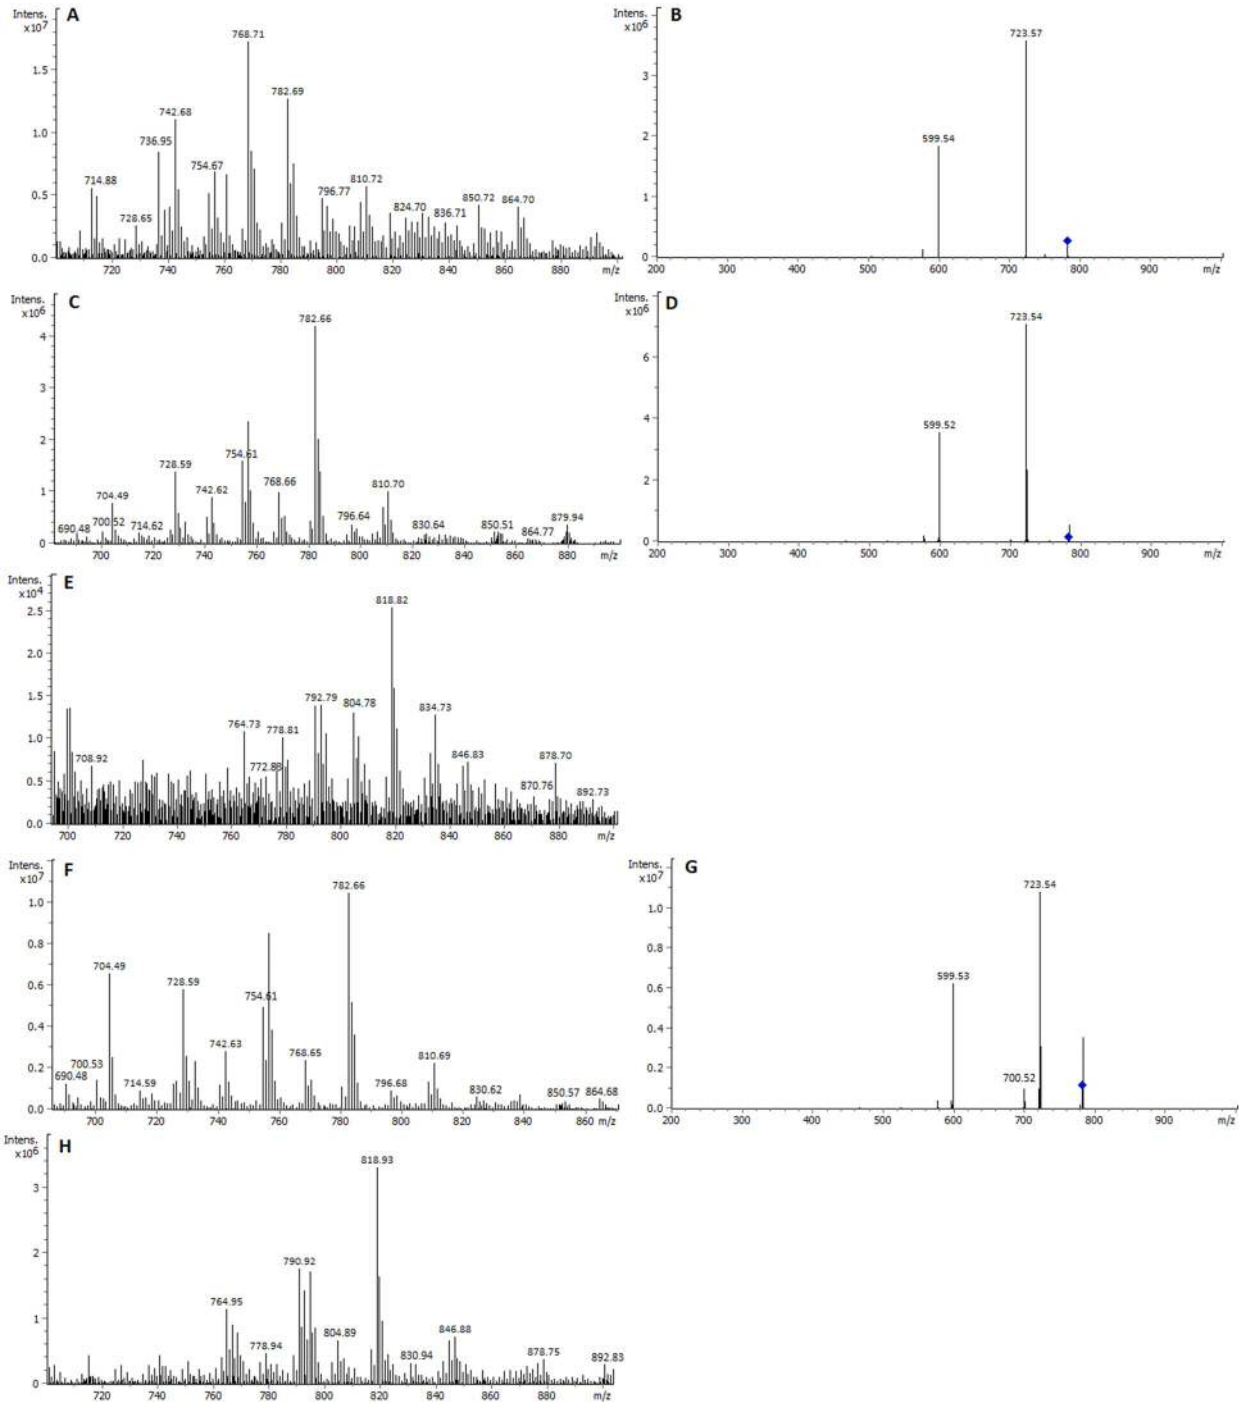

#### S4-4.- Phosphatidylserines (PS)

- A) HPTLC-ESI-MS spectrum of B16-F1-EXOs (peak at 23.8 mm-m.d.)  
B) HPTLC- ESI-MS/MS spectrum of precursor ion at 786.7  $m/z$  (B16-F1-EXOs)  
C) HPTLC-ESI-MS spectrum of B16-F10-EXOs (peak at 22.6 mm-m.d.)  
D) HPTLC- ESI-MS/MS spectrum of precursor ion at  $m/z$  786.8 (B16-F10-EXOs)

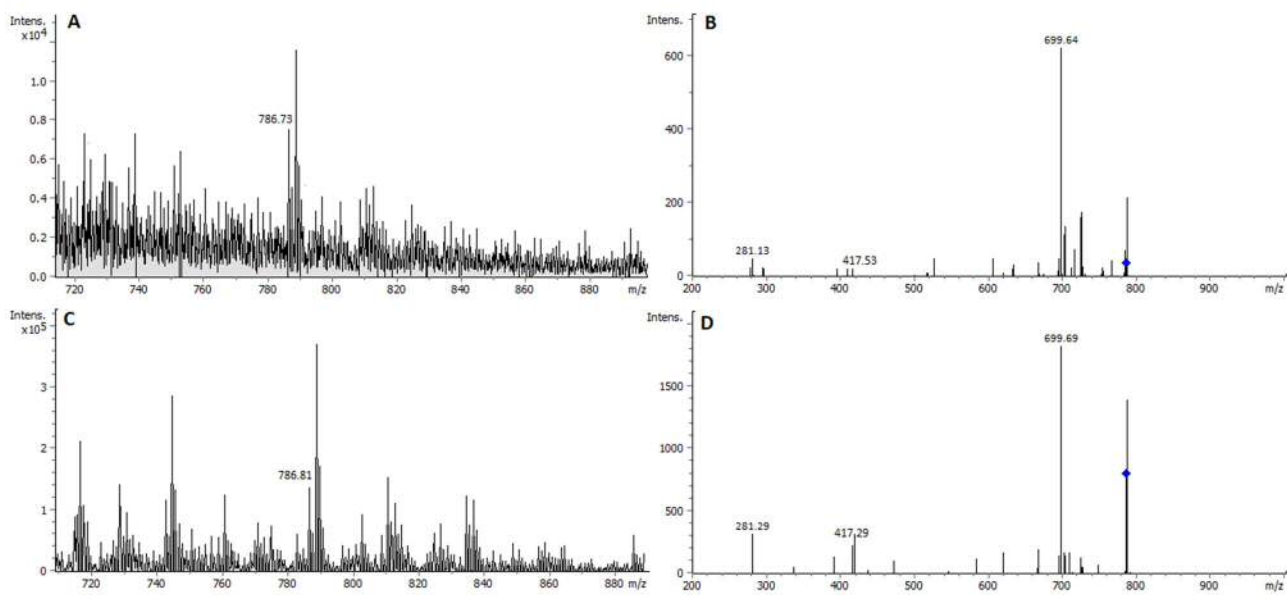



#### S4-5.- Phosphatidylethanolamines (PE)

- A) HPTLC-ESI-MS spectrum of NIH-3T3-EXOs (peak at 24.8 mm-m.d.)  
B) HPTLC-ESI-MS/MS spectrum of precursor ion at  $m/z$  742.9 (NIH-3T3-EXOs)  
C) HPTLC-ESI-MS spectrum of B16-F1-EXOs (peak at 25.9 mm-m.d.)  
D) HPTLC-ESI-MS/MS spectrum of precursor ion at  $m/z$  742.7 (B16-F1-EXOs)  
E) HPTLC-ESI<sup>+</sup>-MS spectrum of B16-F1-EXOs (peak at 25.9 mm-m.d.)  
F) HPTLC-ESI-MS spectrum of B16-F10-EXOs (peak at 22.6 mm-m.d.)  
G) HPTLC-ESI-MS/MS spectrum of precursor ion at  $m/z$  742.8 (B16-F10-EXOs)  
H) HPTLC-ESI<sup>+</sup>-MS spectrum of B16-F10-EXOs (peak at 22.6 mm-m.d.)

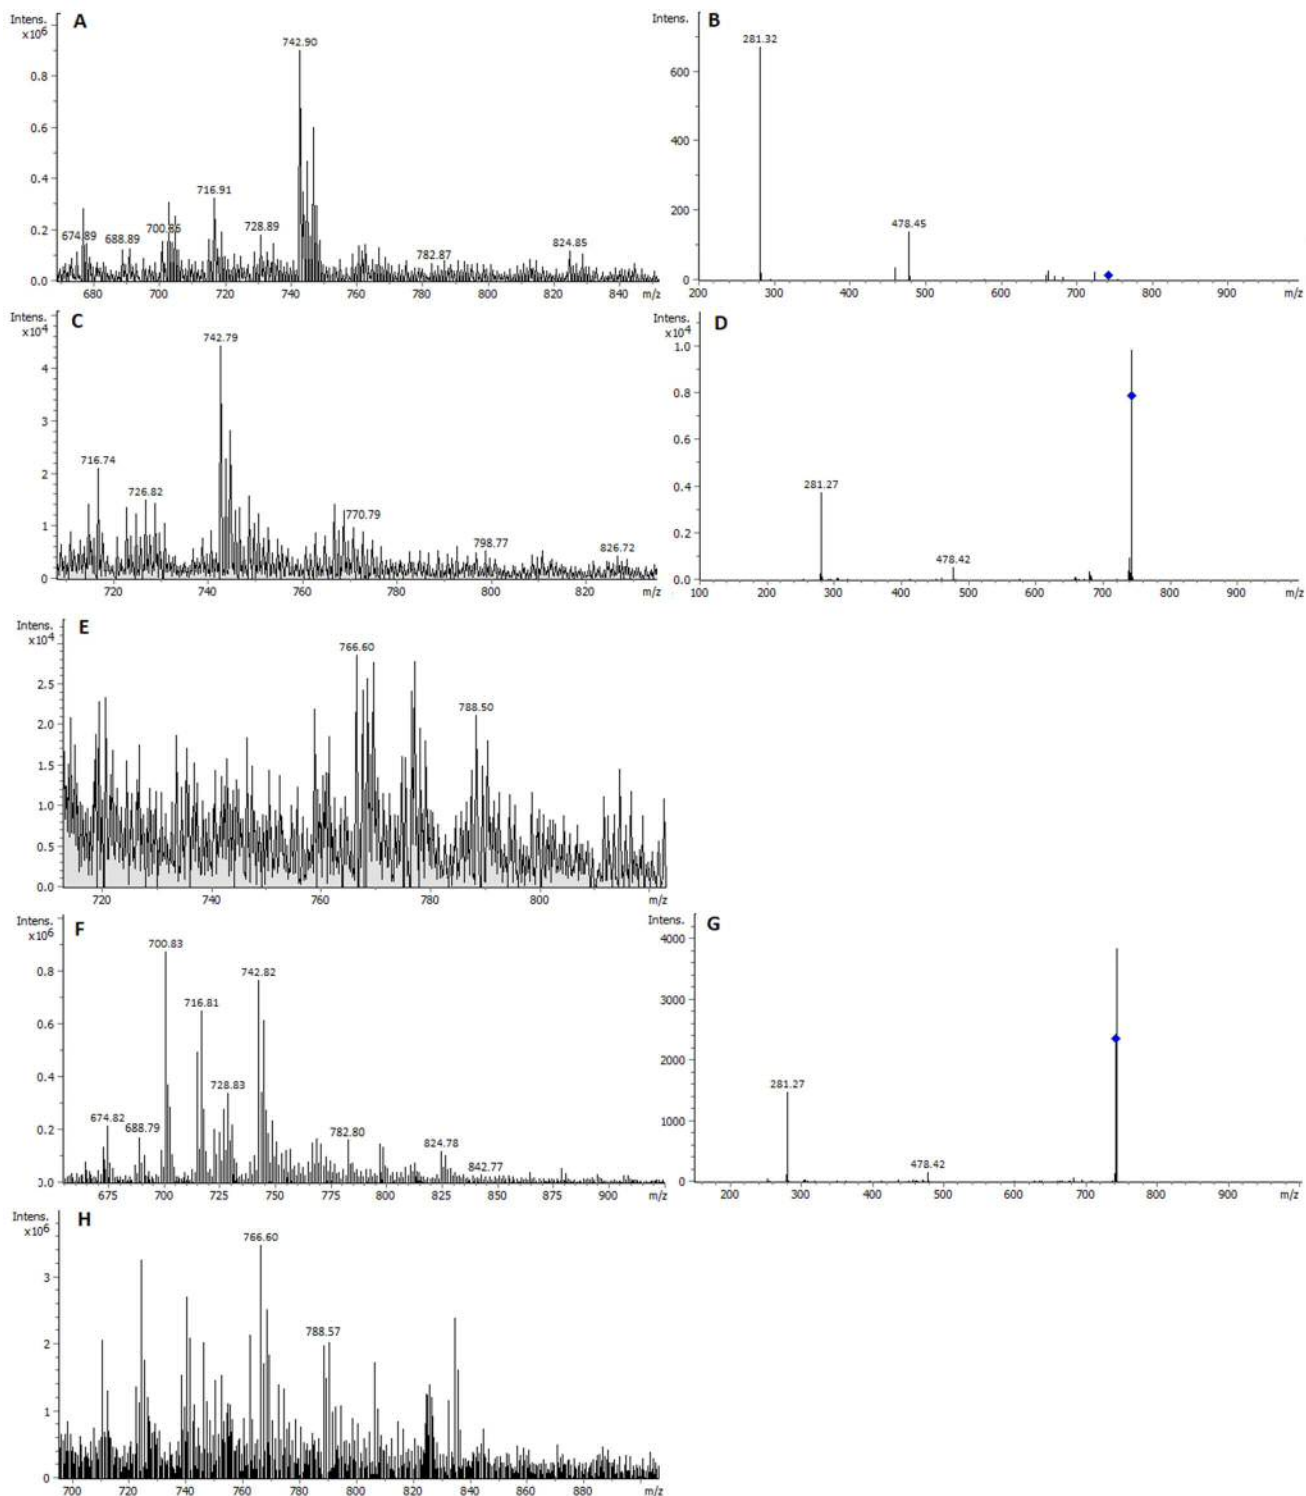

**S4-6.-** Front of elution (band at 30 mm-m.d.)

A) HPTLC-ESI-MS spectrum of B16-F1-EXOs

B) HPTLC-ESI-MS spectrum of B16-F1-EXOs

C) HPTLC-ESI-MS spectrum of B16-F10-EXOs

D) HPTLC-ESI-MS spectrum of B16-F10-EXOs

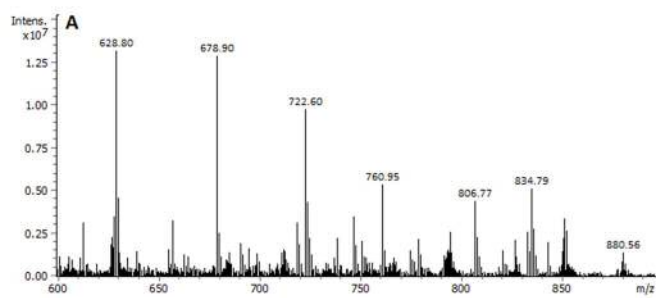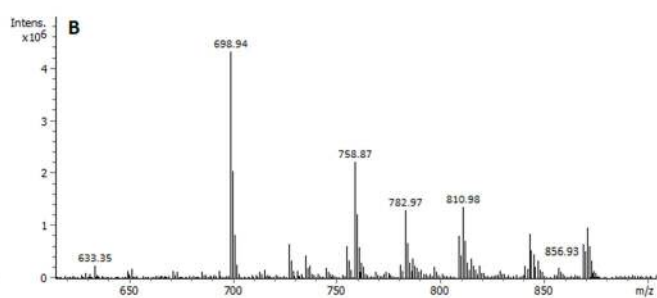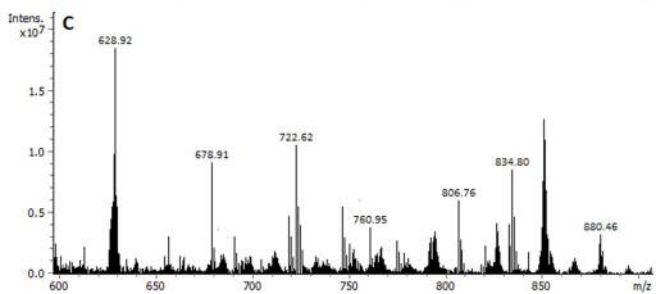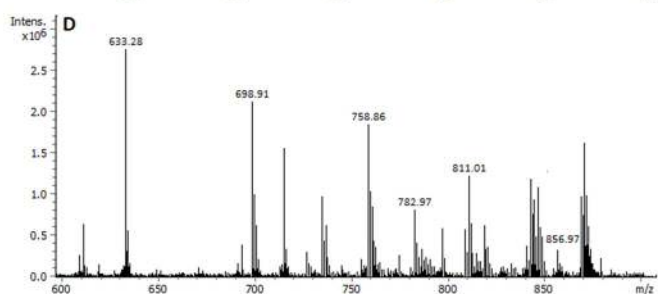

Supplement: s1 [file s1]
